# Supplementary material for: Effectiveness of Psychosocial Interventions Targeting Hazardous and Harmful Alcohol Use and Alcohol-Related Symptoms in Low- and Middle-Income Countries: A Systematic Review
Source: PubMed Central journal article supplement (PMC7438922; doi:10.3389/fpsyt.2020.00768), 2020-08-07
Supplement: Table_2.pdf [file Table_2.pdf]

**Supplementary Table 2: Detailed risk of bias assessment.**

| Study                                | Selection Bias (sequence generation)                                                                  | Selection Bias (allocation concealment)                                                 | Performance Bias (blinding of subjects)                                                  | Detection Bias (blinding of outcome assessment)                                                                                                  | Attrition Bias (handling of incomplete outcome data)                                                                                                                                                                                             | Reporting Bias (selective reporting)                                                                   |
|--------------------------------------|-------------------------------------------------------------------------------------------------------|-----------------------------------------------------------------------------------------|------------------------------------------------------------------------------------------|--------------------------------------------------------------------------------------------------------------------------------------------------|--------------------------------------------------------------------------------------------------------------------------------------------------------------------------------------------------------------------------------------------------|--------------------------------------------------------------------------------------------------------|
| Assanangkorn-chai et al., 2015 (101) | Unclear risk<br>block randomization but generation of random sequence not specified                   | Low risk<br>sequentially numbered opaque sealed envelopes used for concealment          | Low risk<br>P. not blinded to the intervention condition but unlikely to affect outcomes | High risk<br>same interviewers conducted baseline and all FU-interviews; incomplete blinding                                                     | Low risk<br>• very high drop-out rates in both groups at FU2 (35-40%) but attrition analysis conducted<br>• flow-chart presented<br>• analysis of outcome data: intent-to-treat                                                                  | Low risk<br>trial prospectively registered with ANZCTR; all prespecified outcomes of interest reported |
| Babor et al., 1992 (79) <sup>a</sup> | Low risk<br>gender- and age-stratified block randomization using a lottery system                     | Low risk<br>sealed envelopes used for concealment                                       | Unclear risk<br>not specified whether P. were blind to condition assignment              | Unclear risk<br>no blinding procedures described, only that assessors at baseline were different from those at FU in all centers except Bulgaria | High risk<br>• analyses conducted separately by the different centers<br>• none of the centers reports attrition analyses or flow charts<br>• reasons for drop-out are described very roughly if at all<br>• analysis of outcome data: completer | Unclear risk<br>trial not prospectively registered and no trial protocol published                     |
| Kalichman et al., 2007 (95)          | Low risk<br>randomly generated list of counseling session scheduling slots (individual randomization) | Unclear risk<br>not stated                                                              | Low risk<br>P. not blinded to the intervention condition but unlikely to affect outcomes | Unclear risk<br>not stated                                                                                                                       | Low risk<br>• high drop-out rates in all groups (<20%) but attrition analysis conducted<br>• flow-chart presented (but no mention of reasons for attrition)<br>• analysis of outcome data: intent-to-treat                                       | Unclear risk<br>trial not prospectively registered and no trial protocol published                     |
| Kalichman et al., 2008 (96)          | Unclear risk<br>randomization procedure not specified                                                 | Unclear risk<br>allocation done by independent person but concealment method not stated | Unclear risk<br>not specified whether P. were blind to condition assignment              | Low risk<br>FU assessors blinded to treatment allocation                                                                                         | Low risk<br>• attrition analysis conducted<br>• flow-chart presented<br>• analysis of outcome data: per protocol (P. who completed one FU minimum)                                                                                               | Unclear risk<br>trial not prospectively registered and no trial protocol published                     |

|                            |                                                                                   |                                                                                |                                                                                                 |                                                                                                                                       |                                                                                                                                                                                                                                                                                                                                                                     |                                                                                                                    |
|----------------------------|-----------------------------------------------------------------------------------|--------------------------------------------------------------------------------|-------------------------------------------------------------------------------------------------|---------------------------------------------------------------------------------------------------------------------------------------|---------------------------------------------------------------------------------------------------------------------------------------------------------------------------------------------------------------------------------------------------------------------------------------------------------------------------------------------------------------------|--------------------------------------------------------------------------------------------------------------------|
| L'Engle et al., 2014 (102) | Low risk<br>computer-generated block randomization stratified by treatment center | Low risk<br>sequentially numbered opaque sealed envelopes used for concealment | Low risk<br>P. not blinded to the intervention condition but unlikely to affect outcomes        | Low risk<br>FU assessors blinded to treatment allocation                                                                              | Low risk<br><ul style="list-style-type: none"> <li>no attrition analysis but low attrition</li> <li>flow-chart presented</li> <li>analysis of outcome data: intent-to-treat</li> </ul>                                                                                                                                                                              | Low risk<br>trial prospectively registered with clinicaltrials.gov; all prespecified outcomes of interest reported |
| Mertens et al., 2014 (97)  | Unclear risk<br>randomization procedure not specified                             | Low risk<br>sealed envelopes used for concealment                              | Unclear risk<br>not specified whether P. were blind to condition assignment                     | Low risk<br>FU assessors blinded to treatment allocation                                                                              | Low risk<br><ul style="list-style-type: none"> <li>attrition analysis conducted</li> <li>flow-chart presented</li> <li>analysis of outcome data: completer but controlling for baseline variables on which the non-FU-attenders differed in order to monitor selective drop-out (results remained consistent)</li> </ul>                                            | Unclear risk<br>trial not prospectively registered and no trial protocol published                                 |
| Nadkarni et al., 2017 (89) | Low risk<br>block randomization list generated by an independent statistician     | Low risk<br>sequentially numbered opaque sealed envelopes used for concealment | Unclear risk<br>not specified whether P. were blind to condition assignment                     | Low risk<br>FU assessors blinded to treatment allocation                                                                              | Low risk<br><ul style="list-style-type: none"> <li>attrition analysis conducted</li> <li>flow-chart presented</li> <li>analysis of outcome data: intent-to-treat</li> </ul>                                                                                                                                                                                         | Low risk<br>trial prospectively registered with ISCRTN; all prespecified outcomes of interest reported             |
| Noknoy et al., 2010 (105)  | Low risk<br>block randomization using a standard randomization table              | Low risk<br>sealed envelopes used for concealment                              | Low risk<br>P. in control condition received a cover story ("trial focuses on health behavior") | Low risk<br>FU assessors blinded to treatment allocation                                                                              | Low risk<br><ul style="list-style-type: none"> <li>no attrition analysis but low attrition</li> <li>flow-chart presented</li> <li>analysis of outcome data: intent-to-treat</li> </ul>                                                                                                                                                                              | Unclear risk<br>trial not prospectively registered and no trial protocol published                                 |
| Omeje et al., 2018 (87)    | Low risk<br>computer-generated individual randomization                           | Low risk<br>P. picked envelope containing the condition from a container       | Unclear risk<br>not specified whether P. were blind to condition assignment                     | High risk<br>all instruments were self administered by the P. who were most likely non-blinded, therefore high risk of detection bias | High risk<br><ul style="list-style-type: none"> <li>reported only the data of those P. that attended all 20 group therapy sessions</li> <li>flow-chart presented (but information that P. who missed 1+ session(s) were excluded from analyses is not apparent from flow-chart; drop-outs are not reported)</li> <li>analysis of outcome data: completer</li> </ul> | Unclear risk<br>trial not prospectively registered and no trial protocol published                                 |

|                            |                                                                                                                    |                                                                                     |                                                                                          |                                                                                                |                                                                                                                                                                                                                                 |                                                                                                       |
|----------------------------|--------------------------------------------------------------------------------------------------------------------|-------------------------------------------------------------------------------------|------------------------------------------------------------------------------------------|------------------------------------------------------------------------------------------------|---------------------------------------------------------------------------------------------------------------------------------------------------------------------------------------------------------------------------------|-------------------------------------------------------------------------------------------------------|
| Pal et al., 2007 (100)     | Low risk<br>coin tossing (individual randomization)                                                                | Unclear risk<br>not stated                                                          | Unclear risk<br>not specified whether P. were blind to condition assignment              | Low risk<br>FU assessors blinded to treatment allocation                                       | Low risk<br><ul style="list-style-type: none"> <li>no attrition analysis or flow-chart but drop-out generally very low (3-4%)</li> <li>analysis of outcome data: completer</li> </ul>                                           | Unclear risk<br>trial not prospectively registered and no trial protocol published                    |
| Papas et al., 2011 (106)   | Low risk<br>gender-stratified simple block randomization procedure                                                 | Low risk<br>P. drew paper with concealed condition from a jar (supervised by staff) | Low risk<br>P. not blinded to the intervention condition but unlikely to affect outcomes | High risk<br>non-blinded FU assessors were responsible for both recruiting and interviewing P. | Low risk<br><ul style="list-style-type: none"> <li>no attrition analysis but low attrition</li> <li>flow-chart presented</li> <li>analysis of outcome data: intent-to-treat</li> </ul>                                          | Low risk<br>trial prospectively registered with ICTRP; all prespecified outcomes of interest reported |
| Peltzer et al., 2013 (93)  | Low risk<br>"secure remote randomization service" (cluster randomization of public primary health care facilities) | Unclear risk<br>not stated                                                          | Low risk<br>P. not blinded to the intervention condition but unlikely to affect outcomes | Low risk<br>FU assessors blinded to treatment allocation                                       | Low risk<br><ul style="list-style-type: none"> <li>very high drop-out rates in all groups (20-60%) but attrition analysis conducted</li> <li>flow-chart presented</li> <li>analysis of outcome data: intent-to-treat</li> </ul> | Low risk<br>trial prospectively registered with PACTR; all prespecified outcomes of interest reported |
| Pengpid et al., 2013 (103) | Low risk<br>computer-generated block randomization                                                                 | Low risk<br>sequentially numbered opaque sealed envelopes used for concealment      | Low risk<br>P. not blinded to the intervention condition but unlikely to affect outcomes | Low risk<br>FU assessors blinded to treatment allocation                                       | Low risk<br><ul style="list-style-type: none"> <li>high drop-out in all groups (&gt;20%) but attrition analysis conducted</li> <li>flow-chart presented</li> <li>analysis of outcome data: intent-to-treat</li> </ul>           | Low risk<br>trial prospectively registered with PACTR; all prespecified outcomes of interest reported |
| Pengpid et al., 2015 (104) | High risk<br>hospital used as unit of randomization                                                                | High risk<br>not stated (but high risk connected to randomization method)           | Low risk<br>P. not blinded to the intervention condition but unlikely to affect outcomes | Low risk<br>FU assessors blinded to the respective hospital's randomization status             | Low risk<br><ul style="list-style-type: none"> <li>high drop-out rates in all groups (&gt;20%) but attrition analysis conducted</li> <li>flow-chart presented</li> <li>analysis of outcome data: intent-to-treat</li> </ul>     | Unclear risk<br>trial not prospectively registered and no trial protocol published                    |

|                                 |                                                                                       |                                                                                                                                        |                                                                                                                                                                                           |                                                                                                                                     |                                                                                                                                                                                                    |                                                                                                                                                                           |
|---------------------------------|---------------------------------------------------------------------------------------|----------------------------------------------------------------------------------------------------------------------------------------|-------------------------------------------------------------------------------------------------------------------------------------------------------------------------------------------|-------------------------------------------------------------------------------------------------------------------------------------|----------------------------------------------------------------------------------------------------------------------------------------------------------------------------------------------------|---------------------------------------------------------------------------------------------------------------------------------------------------------------------------|
| Rendall-Mkosi et al., 2013 (94) | Low risk<br>computer-generated individual randomization                               | Low risk<br>sealed envelopes used for concealment                                                                                      | Unclear risk<br>blinding not specified and randomization of individuals rather than sites and intervention over 2 months so P. in CG may have been influenced by contact with those in TG | High risk<br>FU-assessors different from personnel conducting the intervention but blinding to condition was "difficult"            | Low risk<br>• high drop-out rates in all groups (>20%), no attrition analysis but comprehensive reasoning for attrition in flow-chart<br>• analysis of outcome data: intent-to-treat and completer | High risk<br>trial not prospectively registered and no trial protocol published; not reported if P. randomized to third arm which was abolished received any intervention |
| Segatto et al., 2011 (88)       | Low risk<br>lottery system (individual randomization)                                 | Unclear risk<br>randomization performed by emergency room personnel not linked to the clinical trial but concealment method not stated | Low risk<br>P. were blinded to the intervention applied                                                                                                                                   | Low risk<br>FU assessors blinded to treatment allocation                                                                            | Low risk<br>• attrition analysis conducted<br>• flow-chart presented<br>• analysis of outcome data: completer                                                                                      | Unclear risk<br>trial not prospectively registered and no trial protocol published                                                                                        |
| Sheikh et al., 2017 (90)        | Low risk<br>computer-generated individual randomization                               | Low risk<br>sealed envelopes used for concealment                                                                                      | Unclear risk<br>not specified whether P. were blind to condition assignment                                                                                                               | High risk<br>not stated if assessor was blind but the presence of the relative/ co-therapist might have influenced the P.'s answers | Low risk<br>• 100% retention at FU after 2 months<br>• flow-chart presented<br>• analysis of outcome data: completer                                                                               | Unclear risk<br>trial not prospectively registered and no trial protocol published                                                                                        |
| Shin et al., 2013 (92)          | Low risk<br>computer-generated block randomization stratified by assigned TB provider | High risk<br>no concealment of allocation                                                                                              | Low risk<br>P. not blinded to the intervention condition but unlikely to affect outcomes                                                                                                  | Unclear risk<br>not stated                                                                                                          | Low risk<br>• no attrition analysis but low attrition<br>• flow-chart presented<br>• analysis of outcome data: intent-to-treat                                                                     | Low risk<br>trial prospectively registered with clinicaltrials.gov; all prespecified outcomes of interest reported                                                        |
| Sorsdahl et al., 2015 (98)      | Low risk<br>individual randomization using a random number generator                  | Low risk<br>sequentially numbered sealed envelopes used for concealment                                                                | Unclear risk<br>not specified whether P. were blind to condition assignment                                                                                                               | Low risk<br>FU assessors blinded to treatment allocation                                                                            | Low risk<br>• very high drop-out rates in all groups (40-58%) but attrition analysis conducted<br>• flow-chart presented<br>• analysis of outcome data: intent-to-treat                            | Low risk<br>trial prospectively registered with PACTR; all prespecified outcomes of interest reported                                                                     |

|                           |                                                                                                                                                                                                                                                                                            |                                                                                               |                                                                             |                                                                                                    |                                                                                                                                                                                                                                                             |                                                                                                                    |
|---------------------------|--------------------------------------------------------------------------------------------------------------------------------------------------------------------------------------------------------------------------------------------------------------------------------------------|-----------------------------------------------------------------------------------------------|-----------------------------------------------------------------------------|----------------------------------------------------------------------------------------------------|-------------------------------------------------------------------------------------------------------------------------------------------------------------------------------------------------------------------------------------------------------------|--------------------------------------------------------------------------------------------------------------------|
| Wandera et al., 2016 (99) | Low risk<br>computer-generated random numbers for block randomization                                                                                                                                                                                                                      | Low risk<br>sequentially numbered, opaque, sealed envelopes used for concealment              | Unclear risk<br>not specified whether P. were blind to condition assignment | Unclear risk<br>same person assessed baseline and FU but not stated if s/he was blind to condition | Low risk<br><ul style="list-style-type: none"> <li>drop-out at FU2 very low (2-4%) and attrition analysis conducted</li> <li>flow-chart presented</li> <li>analysis of outcome data: intent-to-treat</li> </ul>                                             | Low risk<br>trial prospectively registered with clinicaltrials.gov; all prespecified outcomes of interest reported |
| Witte et al., 2011 (91)   | Low risk<br>cluster randomization using a random number generator (entities for clustering=women groups; "randomizing by group was more efficient than attempting to accrue enough women in a short enough period of time to then randomize individually to three conditions at one time") | Unclear risk<br>sequence generation centrally done but not stated if allocation was concealed | Unclear risk<br>not specified whether P. were blind to condition assignment | Low risk<br>FU assessors blinded to treatment allocation                                           | Low risk<br><ul style="list-style-type: none"> <li>high drop-out (33-15% with higher drop-out in TG1 compared to other groups) but attrition analysis conducted</li> <li>flow-chart presented</li> <li>analysis of outcome data: intent-to-treat</li> </ul> | Unclear risk<br>trial not prospectively registered and no trial protocol published                                 |

<sup>a</sup> for the WHO-Multicenter trial (Babor, 1992) the overall report was taken as a basis for assessment of risk of bias. In case deviations were found for specific study centers this was noted here. FU: follow-up, P.: participant, TG: treatment group.
